## 1 **Spatial Meta-transcriptomes of human and murine intestines**

2 Lin Lv<sup>#1</sup>, Ru Feng<sup>#1</sup>, Xue Li<sup>#1</sup>, Xiaofei Yu<sup>2</sup>, GuoQiang Chen<sup>3</sup>, Lei Chen<sup>\*1</sup>

3 1 Shanghai Institute of Immunology, Shanghai Jiao Tong University School of Medicine, Shanghai 200025,  
4 China.

5 2 State Key Laboratory of Genetic Engineering, School of Life Sciences, Shanghai Engineering Research Center  
6 of Industrial Microorganisms, Fudan University, Shanghai, 20082, China.

7 3 Department of Pathophysiology, Key Laboratory of Cell Differentiation and Apoptosis of Chinese Ministry of  
8 Education, State Key Laboratory of Oncogenes and Related Genes and Chinese Academy of Medical Sciences  
9 Research Unit (NO.2019RU043), Shanghai Cancer Institute, Rui-Jin Hospital, Shanghai Jiao Tong University  
10 School of Medicine, 200025, Shanghai, China.

11 # These authors contributed equally.

12 \* To whom correspondence should be addressed: Lei Chen (lei.chen@sjtu.edu.cn)

13

### 14 **Abstract**

15 We developed an analysis pipeline that can extract microbial sequences from Spatial Transcriptomic data and  
16 assign taxonomic labels to them, generating a spatial microbial abundance matrix in addition to the default  
17 host expression one, enabling simultaneous analysis of host expression and microbial distribution. We applied  
18 it on both human and murine intestinal datasets and validated the spatial microbial abundance information  
19 with alternative assays. Finally, we present a few biological insights that can be gained from this novel data. In  
20 summary, this proof of concept work demonstrated the feasibility of Spatial Meta-transcriptomic analysis, and  
21 pave the way for future experimental optimization.

### 22 **Background**

23 Spatial transcriptomic sequencing has revolutionized the biological research field. This class of technologies  
24 combine the strength of two pillars of modern biological research, sequencing and imaging. It generally works  
25 by capturing the messenger RNA from a permeabilized tissue slice, and label these RNA molecules with 2D  
26 spatial barcodes [1, 2]. Complex tissues such as the brain and tumor saw most utilization [3-9]. In the  
27 intestines and other organs, microbes live alongside or within close proximity to host cells and meta-genomic  
28 sequencing has long been employed to study the complex microbial composition on various host body sites.  
29 These studies, usually referred as microbiome study, have greatly improved our understanding of the human  
30 biology, microbes were found in never-thought before places [10, 11] and showed intriguing dynamics [12].  
31 However, these microbiome studies generally lacked spatial resolution and attempts at addressing this  
32 limitation is just emerging [13, 14]. Inspired by a recent study about COVID19 where virus sequences were

33 recovered from host single cell transcriptomic data and analyzed alongside host data, we wanted to see if it is  
34 possible to capture microbial sequences in spatial transcriptomic sequencing and present our proof of  
35 concept work here.

## 36 **Results & Discussion**

37 We performed spatial transcriptomic sequencing, using the Visium kit from 10X Genomics, on both human  
38 and murine intestinal samples, where microbial presence is well-known. The human samples included  
39 dissected colon samples from two colorectal cancer patients, samples from the tumor sites and histologically  
40 normal sites distant from the tumor were included. The murine samples came from both small intestine and  
41 large intestine, and cross-sectional slices from 3 mice were put in a single window (Fig. 1A). Each window was  
42 sequenced to at least 85k reads per covered spots, and the captured RNAs were on average 11k per spots,  
43 similar to that of published results [1].

44 We developed an analysis pipeline to extract microbial information from the ST data. In short, unmapped  
45 reads were aligned against the NCBI NT database and the mapped reads in this round were subsequently  
46 assigned tax IDs. For reads coming from the same UMI (Unique Molecular Identifier) group, a common  
47 ancestor was called and assign to that UMI. The end result is a spatial species abundance matrix produced  
48 alongside the spatial host gene expression matrix generated via the standard spatial transcriptomics analysis.

49 The percentage of microbial sequences against total reads varied across different samples, ranging from  
50  $7.32 \times 10^{-7}$  in human samples to  $2.26 \times 10^{-3}$  in murine ones. The Visium kit used poly T to capture  
51 messenger RNA and in theory microbial sequences without polyA tail would be depleted. While this is indeed  
52 the case, some spurious random priming did occur and sequences without polyA were still captured. This is in  
53 line with report from the RNA-velocity paper[15-17], where immature messenger RNA, which lacked polyA  
54 tail, account for about 25% of the data in 10X Genomics Chromium single cell platform, which uses polyA  
55 capture. Furthermore, ribosomal RNAs are the most abundant RNA category in a cell, account for more than  
56 80% of total RNA. Ribosomal RNA is also the molecular marker of choice for microbial taxonomy. Accordingly,  
57 the majority of the microbial sequences recovered in SMT were from ribosomal RNAs (Fig. 1D). For these  
58 reasons, the microbial signals obtained from our Spatial Meta-Transcriptomic (SMT) analysis was unlikely to  
59 be merely artifacts.

60 For comparison, we applied our microbial sequence extraction method on single cell sequencing data  
61 derived from un-sorted intestinal samples and the microbial signal thus produced were very likely drowned in  
62 noise as it was relatively evenly spread across different cell types (Fig S1A). This may have to do with the fact  
63 that only intra-cellular bacteria can be captured in these conditions and these bacteria were rare and that the  
64 gentle digestive environment inside a droplet was ineffective for most microbes.

65 To further evaluate the extent of contaminating microbial sequences during experiments versus true organ  
66 resident microbial signals. We plotted the microbial abundance of all spots, regardless of whether it's covered  
67 by tissue or not (Fig 1A). For both human and mouse, the luminal side of the intestines harbored more  
68 microbial signal as is expected. The human tumor tissue also contained higher abundance of microbes and  
69 also more microbes penetration deeper into the tissue, as would be expected from the compromised barrier  
70 function in tumor. These clear and expected patterns gave validation to our SMT methods as noise signal  
71 would show up relatively randomly across the capture slide.

72 To compare results with alternative methods, for the mice samples, we visualized slices close in proximity  
73 from the same embedded sample by Florescent In Situ Hybridization (FISH) with the bacterial probe EUB338  
74 (Fig 1B). The FISH result was in agreement with SMT with bacteria presence concentrated in the intestinal  
75 lumen. Of the three slices shown in the same window, the general bacteria abundance varies and  
76 corresponds well with SMT result. In another word, the intestine piece with most bacteria as shown by FISH is  
77 the one with most bacteria sequences in SMT result. These variances could be due to variance in processing  
78 individual sample and in difference in exact sample origin in the gut, i.e., more distal or proximal. All these  
79 observations lend credibility to SMT approach.

80 After the assessment of contamination, we continued to evaluate the biases in the microbial signals  
81 collected in SMT. Because during the Visium process, the host tissue slides were permeabilized to release its  
82 RNA and this process is far from ideal for microbial sequence capture. This brought up the question if certain  
83 microbial species would be more amicable to this condition and the final result would present a biased  
84 picture of the true microbiome. We also cautioned that if the capture efficiency of microbial sequences were  
85 so low as to make the result subject to great fluctuation that will also make the result unreliable. To answer  
86 these questions, we extracted RNAs from corresponding tissue slices and performed total RNA sequencing, in  
87 which polyA based enrichment is not used and only host ribosomal RNA is depleted. Similar to our SMT  
88 pipeline, we processed the bulk total RNA-Seq data to generate microbial abundances, one abundance profile  
89 for on slice. To compare with bulk sequencing data, we then combined the SMT's per spot abundance profiles  
90 for one window into pseudo-bulk ones and first evaluated the correlation between host genes and then  
91 microbial abundances at family level (Fig. 1C). The results showed that the host gene correlation was at 0.91  
92 with p value  $2.2 \times 10^{-16}$  and that the microbial abundance reached 0.83 with p value of  $2.7 \times 10^{-7}$ ,  
93 comparable to host gene levels and thus validating SMT approach.

94 Due to its RNA-Seq nature, our SMT methodology captures Fungi and viral sequences as well as bacteria  
95 ones. Zoonotic viruses generally have mRNA that resemble their hosts and interestingly we can identify one  
96 such virus infection case in great spatial detail in one of our human CRC datasets. In one out of the two  
97 patients examined, viral sequences reaching as high as 3.4% were seen in some spots at the tumor site. This  
98 virus, identified as Cytomegalovirus, is known to infect fibroblast, and a deconvolution of the infected spots,

99 which were all 55 $\mu$ m in diameter and thus contained many cells, showed them to be mostly fibroblast (Fig 2A).  
100 We next asked what the immediate consequence of viral infection was on these fibroblasts. To answer this,  
101 infected spots were compared to un-infected fibroblast rich spots. Interestingly, among the differentially  
102 expressed genes recovered, interferon related genes were not found, potentially due to the immune-  
103 compromised nature of the tumor micro-environment. Still, some known genes were found, including HLA-E  
104 which is know to be up-regulated by cytomegalovirus infection, IL32 and TNIP, both upregulated and involved  
105 in host defense (Fig 2B).

106 The local cellular response to infection shown above is a good testament to SMT's capability in  
107 investigating microbe-host interaction. Compared to other methods in this context, FISH based for example,  
108 SMT's strength comes in its taxonomical resolution and systemic nature. For a demonstration, we used the  
109 murine dataset as it included multiple individual animals and covered complete cross-section of the intestines.  
110 We asked, which host genes and which microbes showed great spatial correlation. Due to the sparse nature  
111 of the microbial signals and to lesser degree, some of the host genes, we first smoothed both categories of  
112 signals (Fig. S2A, Methods). Then spatial correlation analysis was performed and revealed a number of  
113 interesting interactions (Fig 2C for small intestine, Fig S2B for large intestine). Among the most significant, the  
114 bacteria *Porphyromonas* showed high correlation with a series of immune defense related genes such as Saa1  
115 in the small intestine, while *Helicobacter* correlated with Dmnt1 in the large intestine, and consistently,  
116 Helicobacter also correlated with Saa1(Fig 2B, Fig S2B). We can also highlight individual interactions by  
117 plotting the intensities of involved host gene and microbe on the slice and directly visualize the extent of the  
118 interaction, whole sections of intestines in this particular case (Fig 2DE, Fig S2C).

119 Our current SMT method generates spatial microbial abundance matrix alongside the spatial host  
120 expression matrix. The underlying spatial transcriptomic methods are rapidly evolving[18], reaching higher  
121 resolution and obtaining more sequences per area, translating to higher sensitivity. SMT too will  
122 correspondingly reap the benefit. Furthermore, by simply capturing more sequences or by using specifically  
123 designed capture oligos, a bacteria specific 16S capture oligo alongside the polyT capture oligo for example, it  
124 may become possible to actually profile the microbial transcriptomes. For tissues where microbes were  
125 abundant such as the intestines, SMT enables the systemic study of host and microbe interaction. In other  
126 more sterile tissues, SMT will shed light on the consequence of microbial presence, for example, how  
127 microbes travel to remote tumor site (as in non-intestinal solid cancers) and help settle the debate on the  
128 whether certain body site is sterile or not, i.e., in-utero fetus[19, 20].

## 129 **Conclusions**

130 Our proof of concept work demonstrated the feasibility of Spatial Meta-Transcriptomic sequencing and

131 analysis. Our analysis framework already extracted spatial microbial abundance information out of data  
132 generated by currently commercially available kits. We further demonstrated that true signals outweigh  
133 contaminations and that the biases are low. Actually, the FISH result suggested the current SMT method to be  
134 very sensitive. Our work paves the way for future development of this technology, which will further increase  
135 sensitivity of SMT and its taxonomical resolution. Such methods will enable simultaneous analysis of host  
136 expression with resident microbial abundances, and study host and microbial interactions in never-before  
137 seen resolution and doing so in a systematic manner.

## 138 **Methods**

### 139 **Human/Murine sample collection and processing**

140 We collected samples of pathologically diagnosed with CRC from Rui-jin hospital, Shanghai Jiao Tong  
141 University. Tissue samples were embedded in optimal cutting temperature compound and stored at  $-80^{\circ}\text{C}$ .  
142 Before the tissue optimization experiment was performed, the RNA quality was checked ( $\text{RIN} > 7.0$ ). The  
143 tumors are resectable and discussion by clinicians. Six-week-old male C57BL/6 mice were ordered from  
144 Shanghai SLAC Laboratory Animal Co., Ltd. Then maintained in SPF experimental animal center of Fudan  
145 University. For antibiotics treatment, six-week-old mice were orally gavaged with 0.5mg/mL vancomycin  
146 (RPI), 1mg/mL metronidazole, 1mg/mL ampicillin, 1mg/mL neomycin, 1mg/mL gentamycin dissolved in  
147 1XDPBS for one week. The maximum number of adult mice in a cage is 5. Feces and serum were collected and  
148 stored at  $-80^{\circ}\text{C}$ . Tissue samples(intestine and colon) were embedded in optimal cutting temperature  
149 compound and stored at  $-80^{\circ}\text{C}$ , the RNA quality was checked ( $\text{RIN} > 7.0$ ).

### 150 **Spatial transcriptomics.**

151 Tissues were cut into  $10\mu\text{m}$  sections and processed using the Visium Spatial Gene Expression Kit (10x  
152 Genomics) according to the kit's instructions. First step, CRC tissue, mice tissue permeabilization condition  
153 was optimized using the Visium Spatial Tissue Optimization Kit, which was 18 min in mice and 28 min in  
154 human found to be maximum fluorescence signal in both tumor and normal regions. In detail, 4 samples from  
155 2 patients were sequenced by ST. Then were stained with H&E and imaged using a Leica DM6000 microscope  
156 under a 20X lens magnification. Next, reverse transcription, second strand synthesis & denaturation, cDNA  
157 amplification & QC, Visium spatial gene expression library construction was following the manufacturer's  
158 instructions. The resulting complementary DNA library was checked for quality control, then sequenced using  
159 an Illumina NovaSeq 6000 system.

160

## 161 **Spatial transcriptomic sequencing and data processing**

162 Raw reads from 10x Genomics Visium spatial sequencing were aligned to the human transcriptome GRCh38-  
163 3.0.0 reference or mouse transcriptome mm10-3.0.0 reference using 10x Genomics SpaceRanger v.1.0.0  
164 (<https://support.10xgenomics.com/spatial-gene-expression/software/downloads/1.0/#spacerangertab>) and  
165 exonic reads were used to produce mRNA count matrices for these samples. HE histology images were also  
166 aligned with mRNA capture spots using SpaceRanger.

## 167 **Spatial meta-transcriptomic analysis**

168 An in-house pipeline was used for pre-processing of bam file generated by SpaceRanger. Unmapped reads  
169 were extracted from bam file and filtered for non-polynucleotide sequence in preparation for subsequent  
170 alignment. After that, unmapped reads were aligned against nt database with blastn 2.10.1+, the blast output  
171 were formatted to preserve query ID, taxID, subject title, alignment length, e-value, identity, coverage as well  
172 as UMI and spatial barcode which were extracted from bam file. Taxa levels from kingdom to species were  
173 called with taxID by querying a taxa table from NIH taxonomy online port. UMI counts of certain taxID in a  
174 single spot were called by counting unique UMI sequences belonging to respective spatial barcode and thus  
175 we could generate a count matrix with taxID and spatial barcode as row names and column names  
176 respectively.

177 The UMI count matrix were then imported into R to generate a Seurat object (Seurat 4.0.1)[21] with HE  
178 images that had been included in SpaceRanger output directory. Simultaneously, the count matrix and taxa  
179 level info were also used to create a phyloseq object (phyloseq 1.32.0)[22] with an applied taxa level and  
180 integrated into the assay slot of Seurat object.

## 181 **FISH**

182 OCT tissue slides were fixed with methyl alcohol at -20 °C. Slides were stained using the FISH kit (Guangzhou  
183 Exon) following manufacturer s protocol. Cy3 labelled Probes (EUB338 - GCTGCCTCCCGTAGGAGT) were  
184 hybridized overnight at 37°C. Sections were washed at room temperature and 60 °C in washing buffer1 for 5  
185 minutes successively, followed by two washed at 37 °C for 5 minutes in washing buffer2. Staining was  
186 visualized with the Leica TCS SP8 confocal microscope at 20X and 63X. The images were edited using Imaris  
187 Cell Imaging Software.

## 188 **Bulk total RNA-Seq**

189 OCT tissue slides were used for total RNA isolation with TRIzol (Invitrogen) and subjected to RNA sequencing  
190 using Illumina NextSeq 500 system (75-bp paired-end reads). The raw reads were aligned to the mouse

191 reference genome (version mm10) and human reference genome (version hg38) using HISAT2 RNA-  
192 sequencing alignment software[23]. The alignment files were processed to generate read counts for genes  
193 using SAMtools[24] and HTSeq[25]. Read counts were normalized and transmitted to differential analysis  
194 using R package DESeq2[26]. P values obtained from multiple tests were adjusted using the Benjamini-  
195 Hochberg correction. Gene ontology consortium (GO) and Kyoto Encyclopedia of Genes and Genomes (KEGG)  
196 pathway analysis was performed using R package clusterProfiler[27].

## 197 **Data & Code Availability**

198 The raw data of mouse study, analysis pipeline and the matrix for both human and mouse will be made  
199 available upon publication.

200

## 201 **Acknowledgements**

202 We would like to thank the Rui-jin hospital of Shanghai for their help with tumor tissue preparation and  
203 specimen acquisition. We would also like to thank the sequencing diagnosis center of Shanghai Institute of  
204 immunology for their services. This work was in part supported by the School of Life Sciences Fudan university.

205

## 206 **Reference**

207

- 208 1. Stahl, P.L., et al., *Visualization and analysis of gene expression in tissue sections by spatial*  
209 *transcriptomics*. Science, 2016. **353**(6294): p. 78-82.
- 210 2. Salmen, F., et al., *Barcoded solid-phase RNA capture for Spatial Transcriptomics profiling in*  
211 *mammalian tissue sections*. Nat Protoc, 2018. **13**(11): p. 2501-2534.
- 212 3. Berglund, E., et al., *Spatial maps of prostate cancer transcriptomes reveal an unexplored landscape of*  
213 *heterogeneity*. Nat Commun, 2018. **9**(1): p. 2419.
- 214 4. Fawcner-Corbett, D., et al., *Spatiotemporal analysis of human intestinal development at single-cell*  
215 *resolution*. Cell, 2021. **184**(3): p. 810-826 e23.
- 216 5. Moncada, R., et al., *Integrating microarray-based spatial transcriptomics and single-cell RNA-seq*  
217 *reveals tissue architecture in pancreatic ductal adenocarcinomas*. Nat Biotechnol, 2020. **38**(3): p. 333-  
218 342.
- 219 6. Asp, M., et al., *A Spatiotemporal Organ-Wide Gene Expression and Cell Atlas of the Developing*  
220 *Human Heart*. Cell, 2019. **179**(7): p. 1647-1660 e19.



- 221 7. Thrane, K., et al., *Spatially Resolved Transcriptomics Enables Dissection of Genetic Heterogeneity in*  
222 *Stage III Cutaneous Malignant Melanoma*. *Cancer Res*, 2018. **78**(20): p. 5970-5979.
- 223 8. Maniatis, S., et al., *Spatiotemporal dynamics of molecular pathology in amyotrophic lateral sclerosis*.  
224 *Science*, 2019. **364**(6435): p. 89-93.
- 225 9. Maynard, K.R., et al., *Publisher Correction: Transcriptome-scale spatial gene expression in the human*  
226 *dorsolateral prefrontal cortex*. *Nat Neurosci*, 2021. **24**(4): p. 612.
- 227 10. Nejman, D., et al., *The human tumor microbiome is composed of tumor type-specific intracellular*  
228 *bacteria*. *Science*, 2020. **368**(6494): p. 973-980.
- 229 11. Poore, G.D., et al., *Microbiome analyses of blood and tissues suggest cancer diagnostic approach*.  
230 *Nature*, 2020. **579**(7800): p. 567-574.
- 231 12. Ha, C.W.Y., et al., *Translocation of Viable Gut Microbiota to Mesenteric Adipose Drives Formation of*  
232 *Creeping Fat in Humans*. *Cell*, 2020. **183**(3): p. 666-683.e17.
- 233 13. Duncan, K., K. Carey-Ewend, and S. Vaishnav, *Spatial analysis of gut microbiome reveals a distinct*  
234 *ecological niche associated with the mucus layer*. *bioRxiv*, 2020: p. 675918.
- 235 14. Shi, H., et al., *Highly multiplexed spatial mapping of microbial communities*. *Nature*, 2020. **588**(7839):  
236 p. 676-681.
- 237 15. Bergen, V., et al., *RNA velocity-current challenges and future perspectives*. *Mol Syst Biol*, 2021. **17**(8):  
238 p. e10282.
- 239 16. La Manno, G., et al., *RNA velocity of single cells*. *Nature*, 2018. **560**(7719): p. 494-498.
- 240 17. Bergen, V., et al., *Generalizing RNA velocity to transient cell states through dynamical modeling*. *Nat*  
241 *Biotechnol*, 2020. **38**(12): p. 1408-1414.
- 242 18. Chen, A., et al., *Spatiotemporal transcriptomic atlas of mouse organogenesis using DNA nanoball*  
243 *patterned arrays*. *bioRxiv*, 2021: p. 2021.01.17.427004.
- 244 19. Kennedy, K.M., et al., *Fetal meconium does not have a detectable microbiota before birth*. *Nature*  
245 *Microbiology*, 2021. **6**(7): p. 865-873.
- 246 20. Mishra, A., et al., *Microbial exposure during early human development primes fetal immune cells*. *Cell*,  
247 2021. **184**(13): p. 3394-3409.e20.
- 248 21. Butler, A., et al., *Integrating single-cell transcriptomic data across different conditions, technologies,*  
249 *and species*. *Nat Biotechnol*, 2018. **36**(5): p. 411-420.
- 250 22. McMurdie, P.J. and S. Holmes, *phyloseq: an R package for reproducible interactive analysis and*  
251 *graphics of microbiome census data*. *PloS one*, 2013. **8**(4): p. e61217.
- 252 23. Kim, D., et al., *Graph-based genome alignment and genotyping with HISAT2 and HISAT-genotype*.  
253 *Nature Biotechnology*, 2019. **37**(8): p. 907-915.
- 254 24. Danecek, P., et al., *Twelve years of SAMtools and BCFtools*. *GigaScience*, 2021. **10**(2).



- 255 25. Putri, G.H., et al. *Analysing high-throughput sequencing data in Python with HTSeq 2.0*. 2021.  
256 arXiv:2112.00939.
- 257 26. Love, M.I., W. Huber, and S. Anders, *Moderated estimation of fold change and dispersion for RNA-seq*  
258 *data with DESeq2*. Genome Biology, 2014. **15**(12): p. 550.
- 259 27. *clusterProfiler: an R Package for Comparing Biological Themes Among Gene Clusters*. OMICS: A  
260 Journal of Integrative Biology, 2012. **16**(5): p. 284-287.

261

## 262 **Figure legend**

263 **Fig. 1 Spatial meta-transcriptomics demonstrating abundant microbial signal in mouse and human**  
264 **intestinal samples with appreciable diversity. (A)** Feature plot showing abundance of microbial sequences in  
265 mouse small intestine (panel 1), mouse colon (panel2), human colonic normal and tumor samples (panel 3  
266 and 4, with same design, in which normal and tumor samples occupy a single square area), colors indicate  
267 number of microbial sequences in form of Unique Molecular Identifier (UMI). **(B)** Small intestine slices from  
268 mice was stained with FISH probes against bacterial 16S rRNA. Boxed areas in the top row are magnified  
269 below. Scale bars, 300um (top), 20  $\mu$ m (bottom). **(C)** Correlation analysis between SMT and bulk RNA  
270 sequencing data of mouse small intestine. Upper panel demonstrates correlation between microbial  
271 sequence count at family level, bottom panel shows correlation between host gene expression. **(D)** microbial  
272 read composition, data were normalized by samples. **(E)** Barplot illustrating composition of microbial  
273 sequences of human (upper) and mouse (bottom) samples at family level.

274

275 **Fig. 2 Spatial meta-transcriptomics reveal novel and commonly recognized host-microbe interactions. (A)**  
276 Feature plot showing abundance of sequence from genus *Cytomegalovirus* in human colorectal cancer  
277 sample (left) and module score of fibroblasts (right). **(B)** Scatter plot of differential expression analysis with  
278 cytomegalovirus enriched spots and cytomegalovirus absent spots that were tagged with high fibroblast score.  
279 Genes with high significance value (<0.001) were presented with red color, genes responsible for antiviral  
280 response in those genes were labeled blue. **(C)** Dot plot showing colocalized correlation between host gene  
281 expression and genus level microbial abundance in mouse small intestine. **(D)** Spatial feature plot showing  
282 *Porphyromonas* enrichment and Saa1 expression. **(E)** Spatial feature plot showing *Helicobacter* enrichment  
283 and Dmbt1 expression.

284

285 **Fig. S1 Microbiome composition and abundance cross samples. (A)** UMAP visualization of the un-sorted  
286 human colorectal sample, showing the formation of 11 main clusters. **(B)** Microbial signals with high

287 abundance (>0.02%) illustrated in U-MAP plot. **(C)** Microbiome composition cross SMT and bulk RNA seq data  
288 at kingdom level. **(D)** Microbiome composition in bulk RNA seq data at family level.

289  
290 **Fig. S2 Host-microbe interaction analysis with SMT data.** **(A)** Feature plot of original UMI count and  
291 smoothed UMI count with same ST data showing appreciable effect of smoothing. **(B)** Dot plot showing co-  
292 localized correlation between host gene expression and genus level microbial abundance in mouse colon. **(C)**  
293 Spatial feature plot showing Helicobacter enrichment and Saa1 expression.

Fig. 1

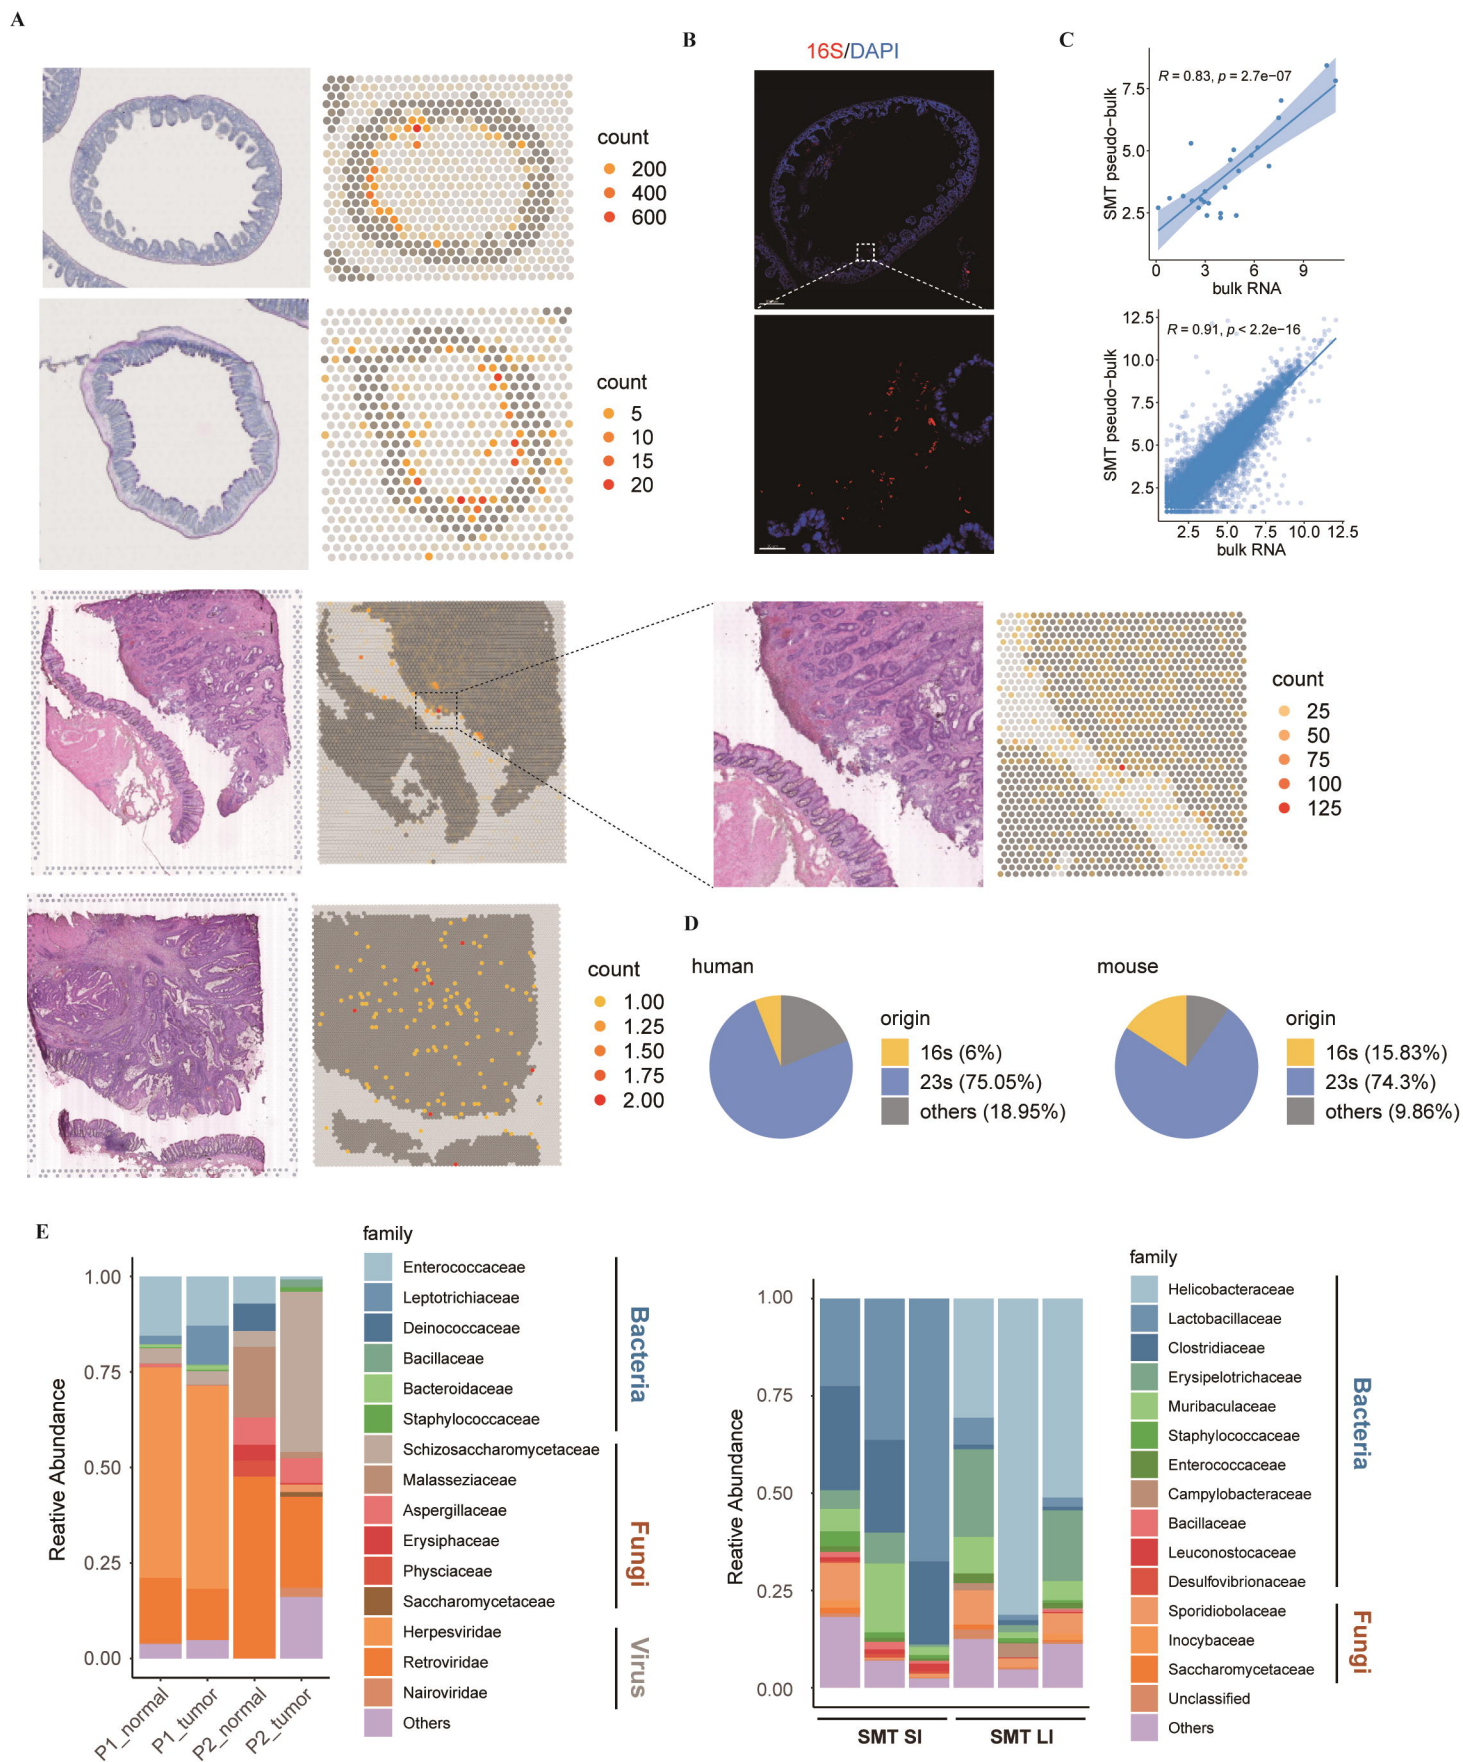



Fig. 2

A bioRxiv preprint doi: <https://doi.org/10.1101/2021.12.13.472336>; this version posted December 13, 2021. The copyright holder for this preprint (which was not certified by peer review) is the author/funder, who has granted bioRxiv a license to display the preprint in perpetuity. It is made available under aCC-BY-NC-ND 4.0 International license.

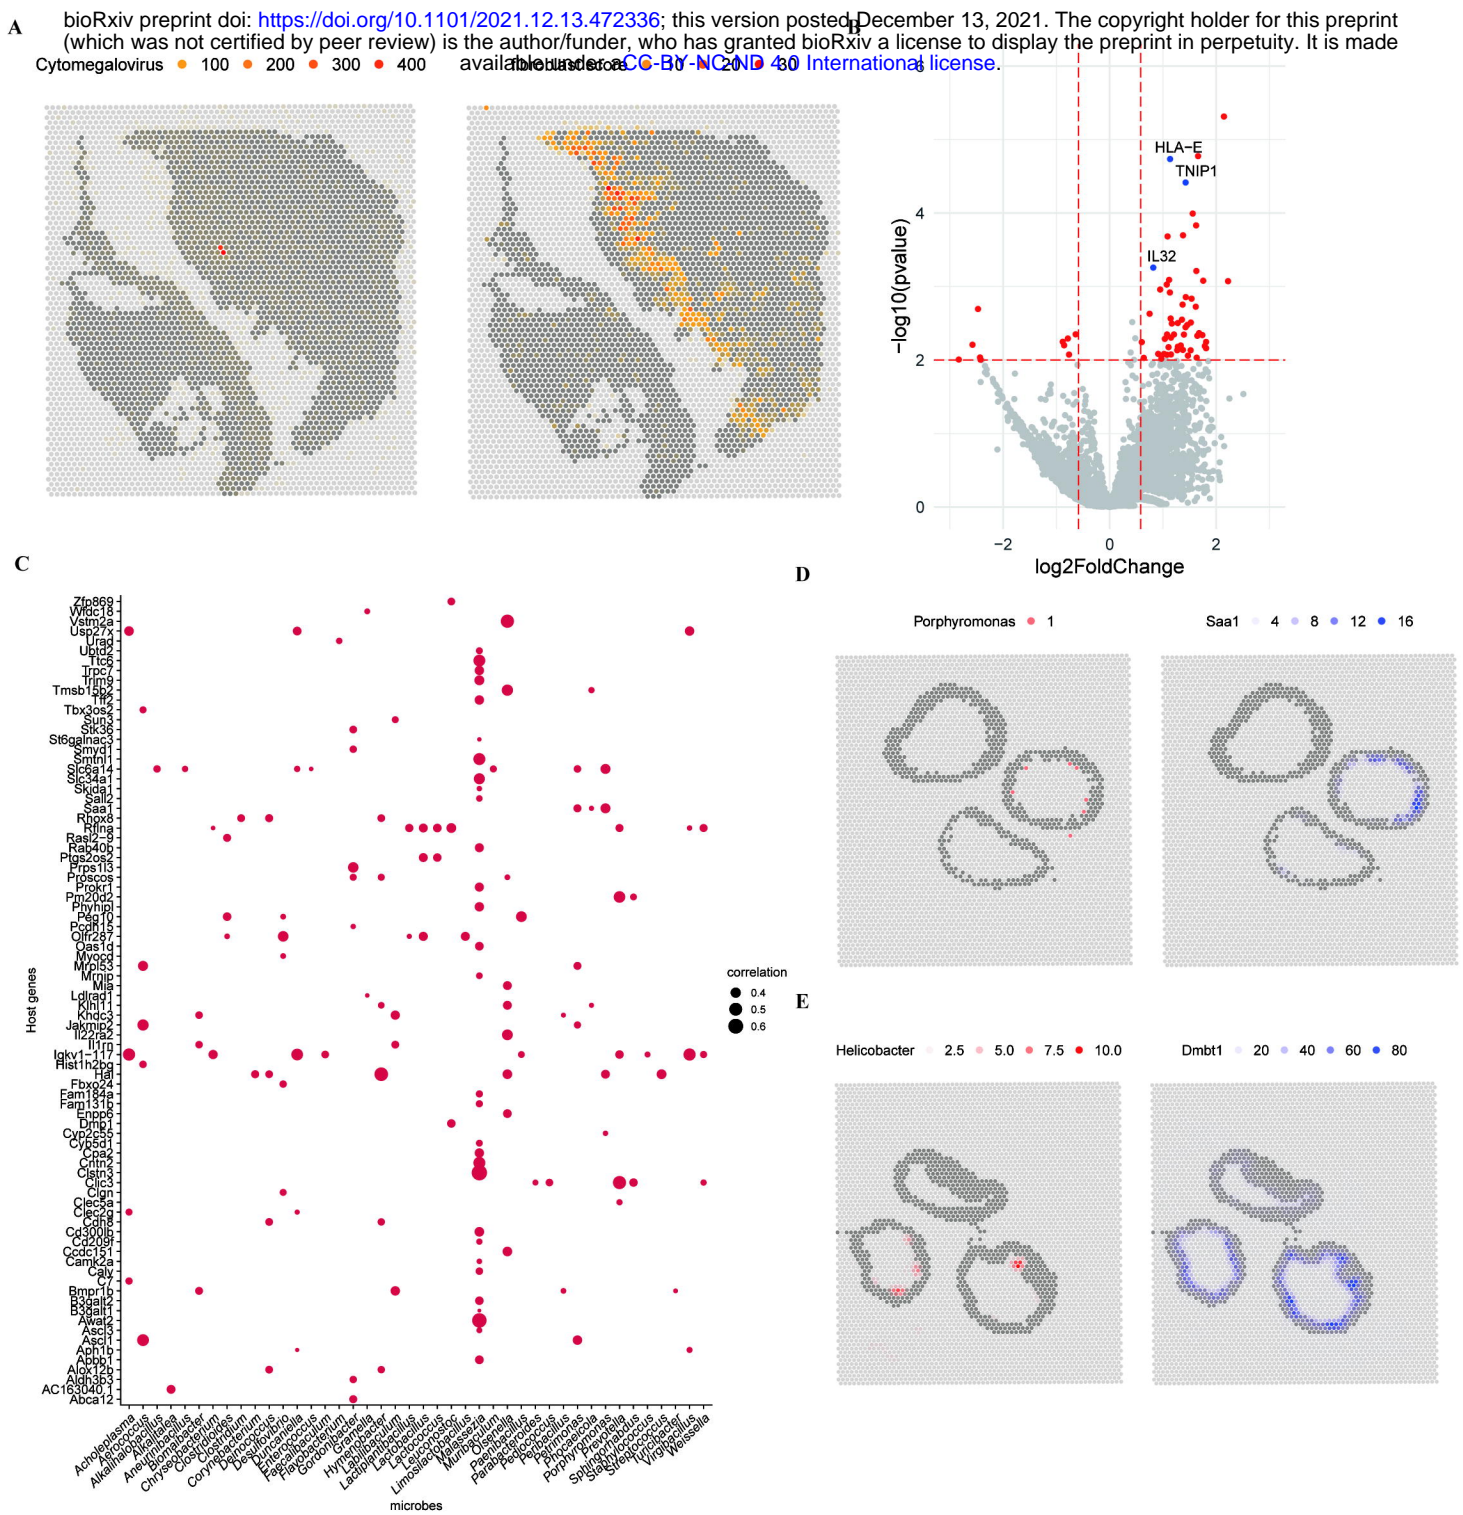

Source: https://www.biorxiv.org/content/10.1101/2021.12.13.472336v1.full.pdf
